# Supplementary material
Source: HighWire-hosted journal article supplement (https://jmg.bmj.com/content/60/12/1224)
Supplement: inline-supplementary-material-1 [file inline-supplementary-material-1.xlsx]

## Sheet: ST1
Supplementary Table S1. Description of the head imaging features in each participant.
Pt.#	Brain MRI	Head CT scan	Number imagings	Age range at imaging (y)	Posterior fossa malformationsa	Ventricular size/ shape alterations	Cystsa	Pituitary gland anomalies	Incomplete hippocampal inversion	White matter anomalies	Vascular anomalies	Inner ear anomaliesa	Other imaging anomalies	ID	Seizures (age of onset)	Hearing impaitment
1	+	–	1	11-17	Large cisterna magna	Temporal horn enlargement	–	–	Bilateral	–	ND	ND	–	Mild		Sensorineural
2	+	–	1	2-3	–	–	–	–	–	–	–	ND	–	Mild		–
3	+	–	4	0-3	Large cisterna magna	–	–	–	Bilateral	–	ND	ND	Partial agenesis of septum pellucidum	Severe	Generalized (18m), evolved in intractable complex partial	–
4	+	–	1	4-5	Dandy Walker variant with anticlockwise rotation of cerebellar vermis, large retrocerebellar cyst in communication with the 4th ventricle	Dilation of lateral ventricles	–	–	Bilateral	Focal rounded T2* hypointensity areas with prevalent cerebellar localization	ND	ND	Bilateral enlargement of Meckel's cave	Moderate	Focal (5y), evolved in status epilepticus (10y), treatable	Sensorineural
5	+	–	1	0-1	Large cisterna magna	Dysmorphic and dilated lateral ventricles	–	–	–	–	ND	ND	–	–		–
6	+	–	1	11-17	Large cisterna magna	Dysmorphic lateral ventricles	–	ND	Bilateral	–	ND	ND	–	Mild		Yes, unspecified
7	+	–	1	≥18	Large cisterna magna	Dilation of lateral ventricles	–	–	Bilateral	–	ND	ND	–	Moderate		–
8	+	–	2	5-12	Large cisterna magna	Dilation of lateral ventricles	–	Shallow pituitary fossa and partial empty sella	Bilateral	–	ND	ND	–	Mild		Conductive
9	+	–	1	11-17	–	–	–	–	–	–	ND	ND	–	Moderate		–
10	+	–	2	2-10	Large cisterna magna	Left trigonal enlargment	–	–	Bilateral	Gliosis of peritrigonal region		ND	–	Mild	Atypical absence (15m)	–
11	–	–												Mild		–
12	+	–	1	2-3	Large cisterna magna	Dysmorphic and dilated lateral ventricles	–	–	Bilateral	–	Duplicated right middle cerebral artery	Bilateral patulous IAC	Bilateral persistent hyperplastic primary vitreous, small right olfactory nerve, benign enlargement of subarachnoid spaces	Severe	Generalized tonic–clonic (8y)	–
13	–	–												Moderate		–
14	+	–	1	0-1	–	–	Pars intermedia cyst	–	–	Reduction of posterior peritrigonal WM thickness	Diffuse arterial tortuosity	ND	–	Mild	Generalized tonic–clonic (2y)	–
15	+	–	1	11-17	Large cisterna magna	–	–	–	–	–	ND	Bilateral patulous IAC	–	Moderate		–
16	+	–	10	0-18	Large cisterna magna	–	–	–	Right	–	ND	Bilateral patulous IAC	Lipoma tuber cinereum, diffuse widened subarachnoid space	Mild		–
17	–	+	1	11-17	Large cisterna magna		–					ND		Mild	Focal (15y)	–
18	–	–												–		–
19	–	–												Moderate		–
20	–	–												Moderate		–
21	+	–	1	11-17	Large cisterna magna	–	–	–	–	–	ND	ND	–	–b		–
22	–	–												–		–
23	+	–	1	6-10	–	Dilated and asymmetric lateral ventricles, temporal horn enlargement	–	–	Bilateral	–	ND	Bilateral patulous IAC	–	Mild		Yes, unspecified
24	+	–	1	0-1	Large cisterna magna, low attachment of the tentorium and low torcula	–	–	ND	–	Cerebellar porencephaly (left hemisphere) due to germinal matrix bleeding	ND	ND	–	Mild		Yes, unspecified
25	+	–	1	4-5	Large cisterna magna	–	–	Empty sella	Bilateral	–	ND	ND	Corpus callosum dysplasia	Moderate	Yes, unspecified (5y)	–
26	+	–	1	0-1	–	–	–	–	–	–	ND	ND	–	Mild	Yes, unspecified (6m)	Conductive
27	+	–	1	≥18	Large cisterna magna	–	–	–	Bilateral	–	ND	–	–	Mild		Mixed
28	+	–	2	6-10	–	–	Arachnoid cyst	–	Bilateral	–	–	–	–	Mild	Generalized tonic–clonic and absence (23m)	Conductive
29	+	–	1	2-3	–	–	–	–	–	–	ND	Bilateral patulous IAC	–	Mild		–
30	+	–	1	≥18	Large cisterna magna	–	–	Partial empty sella	Left	–	–	ND	–	Mild		Yes, unspecified
31	+	–	1	2-3	Large cisterna magna	Dilation of lateral ventricles, temporal horn enlargement	Arachnoid cyst in left ambient cistern	–	Bilateral	–	ND	ND	–	Mild		Conductive
32	+	–	1	6-10	Large cisterna magna	–	–	–	–	–	ND	ND	–	Mild		–
33	–	–												–b		Yes, unspecified
34	+	–	1	4-5	–	–	–	–	–	–	ND	ND	–	Moderate		Conductive
35	+	–	1	2-3	Large cisterna magna	–	–	–	Bilateral	–	ND	ND	–	–		Conductive
36	+	–	1	11-17	Inferior cerebellar vermis hypoplasia	–	Choroid plexus cyst	–	–	–	ND	Bilateral patulous IAC	–	Mild	Complex partial (2y)	–
37	+	–	1	0-1	Large cisterna magna, low attachment of the tentorium and low torcula	–	–	–	Bilateral	Generalized white matter thickness reduction	ND	ND	–	Moderate		Conductive
38	+	–	4	3-6	–	Dilation of lateral ventricles with dysmorphic trigone	–	–	Left	Generalized white matter thickness reduction, periventricular hyperintensity and leukomalacia	ND	ND	–	Mild		–
39	+	–	1	11-17	Large cisterna magna	Dilation of lateral ventricles with dysmorphic trigone	–	–	Bilateral	–	ND	ND	–	Mild	Generalized tonic–clonic (12y)	–
40	–	+	1	0-1	Large cisterna magna		Arachnoid cyst					Bilateral patulous IAC		–b		–
42	–	+	1	4-5	–		–							Mild		Sensorineural
43	+	–	4	0-3	Large cisterna magna	Dilation of lateral ventricles with dysmorphic trigone	–	–	Left	–	Duplicated left anterior inferior cerebellar artery	ND	–	Mild	Pale episodes (8w)	N/A
44	+	–	1	4-5	–	–	–	–	–	–	ND	ND	Thin optic nerve	Severe	Generalized tonic–clonic (5y)	Mixed
45	+	–	2	15-20	–	–	–	–	Bilateral	–	ND	ND	–	Mild	Febrile generalized tonic–clonic (30m), evolved in myoclonic	Conductive
46	+	–	2	7-13	Large cisterna magna	–	–	–	Right	–	ND	ND	–	Mild	Generalized tonic–clonic (6m)	–
47	+	–	2	0-2	–	–	–	–	Bilateral	–	ND	ND	–	Mild		–
48	+	–	2	0-3	Large cisterna magna	Dysmorphic trigone and frontal horn	–	–	–	Posterior peritrigonal white matter hyperintensity and thickness reduction	ND	ND	Hypoplasia of posterior part of corpus callosum	Mild		–
49	+	–	1	2-3	Large cisterna magna	–	–	–	Left	–	ND	ND	–	Mild		–
50	+	–	1	2-3	Large cisterna magna	Dysmorphic trigone and temporal horn enlargement	Arachnoid and subependymal cysts	Partial empty sella	Bilateral	Peritrigonal white matter hyperintensity	ND	Bilateral patulous IAC	Dilation of perivascular space	Mild		Conductive
51	+	–	1	6-10	–	–	–	–	Right	–	ND	–	Dilation of perivascular space	–		Conductive
52	–	–												Mild		–
53	–	–												–		–
54	+	–	1	0-1	–	–	–	–	–	–	ND	–	Olfactory bulb hypoplasia, dilation of perivascular space	Mild		Yes, unspecified
Total	41/53	3/53			29/44a	15/41	6/44a	4/39	26/41	8/41	3/6	8/12a	10/41	44/53	15/53	21/51
Legend: Pt.#, participant; +, present; –, absent; ND, not determined; d, days; m, months; y, years; MRI, magnetic resonance imaging; CT, computed tomography; ID, intellectual disability; IAC, internal auditory canal; a evaluation includes CT scans; b normal ID, but learning difficulties reported. Cells with unavailable data were left empty

## Sheet: ST2
Supplementary Table S2. Description of the skeletal and spinal features in each participant, including auxological parameters at last examination.
Pt.#	Sex	Last examination (age range, y)	Skeletal x-rays available	Other imaging	Skull abnormalities	Jaw and tooth abnormalitiesa	Spine abnormalities	Rib abnormalities	Arm anomalies	Hand anomalies	Skeletal maturation (evaluated on hand x-rays)	Hip and leg anomalies	Foot anomalies	Auxological parameters (SD)
1	F	11-17	Head, spine, hand, foot	Brain MRI	Normal anterior fontanel	Incisor macrodontiac	C2/C3 vertebral fusion, long and prominent coccyx, lumbar dextroscoliosis	–		Lunate-triquetral fusion, flat capitate and hamate, short middle phalanx of 5th finger.	Normal		Cone-shaped epiphyses, flat tarsal and short dysmorphic proximal phalanges in first ray, thin and long calcaneus	Ht: -2.60 Wt: -2.09 OFC: +2.51
2	F	3-5	Pelvis	Brain/ spine MRI		Normal (deciduous dentition)	Conus medullaris located at L2-L3, ventriculus terminalis, long coccyxb					Increased bilateral acetabular angle		Ht: 0.94 Wt: 0.19 OFC: ND
3	F	11-17	Head, spine/pelvis, arm, leg, foot	Brain MRI	Turricephalyb	Incisor macrodontiac	–	Bilateral cervical ribs	–	(Left postaxial polydactyly)a		Coxa valga, femoral head coverage	–	Ht: 0.28 Wt: 0.47 OFC: ND
4	M	6-10		Brain MRI	(Wide anterior fontanel)a	Tooth malposition (crowding)	(No visible abnormality of the curvature)a							ND
5	M	6-10		Brain MRI	(Wide anterior fontanel)a	Incisor macrodontia, tooth malposition (crowding)	(No visible abnormality of the curvature)a							Ht: +2.59 Wt: -0.22 OFC: ND
6	M	11-17	Hand, foot	Brain MRI		Incisor macrodontia, oligodontia	(No visible abnormality of the curvature)a			–	Delayed		Bilateral short 5th metatarsal	Ht: -1.81d Wt: -2.64 OFC: -2.42
7	M	≥18	Hand	Brain MRI		Incisor macrodontia, tooth malposition (crowding)	(No visible abnormality of the curvature)a			–	Normal			Ht: -2.59 Wt: -1.59 OFC: +0.56
8	M	11-17	Hand	Brain MRI	Platybasiab	–	(No visible abnormality of the curvature)a			–	Normal			Ht: -1.04e Wt: -1.12 OFC: -0.20
9	F	11-17	Spine	Brain MRI		Incisor macrodontia, tooth malposition (crowding)	–	Bilateral cervical ribs						Ht: -2.18 Wt: -1.66 OFC: -2.59
10	F	11-17	Teeth, spine, hand	Brain MRI	(Normal anterior fontanel)a	Incisor macrodontia, oligodontia, tooth malposition (crowding)c	–	C7 hypertrophic transverse process		Short middle phalanx of 5th finger	Normal			Ht: -0.80 Wt: -0.27 OFC: +1.08
11	M	11-17	Spine, hand, foot		(Normal anterior fontanel)a	Incisor macrodontia	Thoracic dextroscoliosis, dorsal hyperkyphosis	–		–	Advanced		Broad and short first ray with dysmorphic distal phalanx (left foot)	Ht: +1.03 Wt: +2.02 OFC: +1.54
12	M	3-5	Head/teeth, spine, arm, hand, pelvis, leg, foot	Brain MRI	–	Incisor macrodontia (deciduous)c	–	Left cervical rib	Bilateral short humerus, radius and ulna	–	Delayed	Bilateral short femur, tibia and fibula	Broad and short metatarsal and phalanges of first ray	Ht: -1.48 Wt: +0.92 OFC: -0.97
13	F	11-17	Spine/pelvis, hand, foot		(Normal anterior fontanel)a	Incisor macrodontia	–	Right cervical rib and partial left cervical rib		Short metacarpal bones (1st-5th) and middle phalanx of 5th finger	Normal	–	Short and dysmorphic metatarsal and phalanges of fourth ray	Ht: -1.90 Wt: -2.29 OFC: 0.00
14	F	11-17	Hand	Brain MRI	(Wide anterior fontanel)a	Incisor macrodontia, tooth malposition	(No visible abnormality of the curvature)a			–	Delayed			Ht: -1.11 Wt: -1.55 OFC: +0.36
15	M	≥18	Hand	Brain MRI		Incisor macrodontia, tooth malposition (crowding)	(Scoliosis, dorsal kyphosis)a			–	Normal			Ht: -1.60 Wt: -1.37 OFC: +0.63
16	F	11-17	Teeth, spine/pelvis, arm, hand	Brain MRI	(Wide anterior fontanel)a	Incisor macrodontia, tooth malposition (crowding)c	Scoliosis	C7 hypertrophic transverse process	Humerus lenght at lower limits of normal	Lunate-triquetral fusion, negative ulnar variance	Delayed	–		Ht: -3.39 Wt: -2.15 OFC: -0.07
17	M	11-17	Spine, hand	Head CT scan	Normal anterior fontanelb	Incisor macrodontia, tooth malposition (crowding)	Scoliosis	–		Short middle phalanx of 5th finger	Normal			Ht: -1.45 Wt: -1.18 OFC: -0.74
18	M	3-5	Spine, hand		(Normal anterior fontanel)a	Incisor macrodontia (deciduous)	–	Bilateral cervical ribs		Short middle phalanx of 5th finger	Delayed			Ht: +0.78 Wt: -0.77 OFC: +0.38
19	F	3-5	Spine, hand, pelvis		(Normal anterior fontanel)a	Incisor macrodontia (deciduous)	–	Bilateral cervical ribs		–	Normal	Congenital bilateral hip dysplasia		Ht: -2.31 Wt: -2.32 OFC: +2.21
20	F	11-17	Head, spine, arm, hand		–	Incisor macrodontia, tooth malposition (crowding)	–	Bilateral cervical ribs	–	Lunate-triquetral fusion	Normal			Ht: -0.30 Wt: -0.12 OFC: +0.32
21	M	11-17	Spine, hand	Brain MRI	(Normal anterior fontanel)a	Incisor macrodontia, tooth malposition	–	Bilateral cervical ribs		Dysmorphic capitate and hamate	Delayed			Ht: -2.03 Wt: -1.79 OFC: -1.27
22	F	6-10	Spine/pelvis, arm, hand		(Wide anterior fontanel)a	Normal (deciduous dentition)	–	–	–	Short middle phalanx of 5th finger	Delayed	Femoral heads asymmetry (right 7mm higher)		Ht: -1.69 Wt: -0.28 OFC: ND
23	M	6-10		Brain MRI	(Normal anterior fontanel)a	Incisor macrodontia	(No visible abnormality of the curvature)a							Ht: -2.42 Wt: -1.90 OFC: -0.78
24	F	11-17	Teeth, pelvis	Brain MRI	Scaphocephaly, metopic suture synostosisb	Incisor macrodontia, tooth malposition (crowding)c	(Scoliosis, kyphosis)a					Femoral heads asymmetry		ND
25	M	11-17	Teeth	Brain MRI		Incisor macrodontia, tooth malposition (crowding), talon cusps, maxillary radicular cystc	(No visible abnormality of the curvature)a							Ht: -0.08 Wt: +0.51 OFC: +0.54
26	M	6-10	Head, spine, hand, pelvis, leg	Brain MRI	Widely patent fontanelles and sutures	Incisor macrodontia, tooth malposition (crowding)c	Supernumerary coccygeal vertebrae (n = 6), lumbar hyperlordosis, thoracic hyperkyphosis	Bilateral cervical ribs		–	Delayed	–		Ht: -0.80 Wt: -0.24 OFC: +0.14
27	F	≥18	Head, spine/pelvis, arm, leg	Brain MRI	–	Incisor macrodontiac	Thoracic scoliosis	–	–			–		Ht: -2.50 Wt: -2.75 OFC: -1.90
28	F	11-17		Brain MRI	(Normal anterior fontanel)a	–	(No visible abnormality of the curvature)a							Ht: +1.91 Wt: +1.39 OFC: ND
29	F	6-10	Spine, hand	Brain MRI	Frontal bossingb		–	Bilateral cervical ribs		–	Normal			Ht: -1.99 Wt: -1.09 OFC: -1.96
30	M	≥18	Spine	Brain MRI	(Wide anterior fontanel)a	Incisor macrodontia	Scoliosis, C3/C4 vertebral fusion	–						Ht: -1.82 Wt: -0.02 OFC: +0.97
31	M	3-5		Brain MRI	(Wide anterior fontanel)a	Normal (deciduous dentition)	(No visible abnormality of the curvature)a							ND
32	F	6-10	Head, spine	Brain MRI	Microcephaly < -3 SD, frontal bossing, plagiocephalyb	Incisor macrodontia, oligodontia, tooth malposition (crowding)c	Coccygeal vertebrae agenesis	Bilateral cervical ribs						Ht: -2.83 Wt: -3.30 OFC: -4.47
33	F	≥18	Spine		(Microcephaly < -3 SD)a		–	C7 hypertrophic transverse process						Ht: -4.10 Wt: ND OFC: -3.00
34	M	6-10	Spine, pelvis, hand	Brain/ spine MRI		Oligodontia (deciduous dentition), delayed tooth eruption	Lumbar levoscoliosis, lumbar hyperlordosis	Bilateral cervical ribs		Short middle phalanx of 2nd and 5th right fingers, dysmorphic lunate, pisiform aplasia	Delayed	Legg-Calvè-Perthes of right femur		Ht: +0.20 Wt: +0.03 OFC: +1.13
35	F	3-5		Brain/ spine MRI	Wide anterior fontanel, frontal bossingb	Incisor macrodontia (deciduous)	Conus medullaris located at L2b							Ht: +0.32 Wt: -0.99 OFC: -0.79
36	F	11-17	Spine/pelvis, hand	Brain MRI	(Normal anterior fontanel)a	Incisor macrodontia, tooth malposition (crowding)	Lumbar hyperlordosis with normal morphology of vertebral bodies	ND		Short middle and distal phalanx of 2nd and 5th fingers	Delayed	Absent femoral head ossific nucleus		Ht: -2.86 Wt: -1.52 OFC: +1.31
37	F	3-5	Spine	Brain MRI	(Normal anterior fontanel)a	Incisor macrodontia (deciduous)	–	–						Ht: +0.88 Wt: +0.57 OFC: ND
38	M	6-10	Head, spine, hand, pelvis, leg	Brain/ spine MRI	Wide anterior fontanel	Incisor macrodontiac	Hydrosyringomyeliab	–		Negative ulnar variance	Delayed	–		Ht: +0.03 Wt: -0.18 OFC: ND
39	F	11-17	Spine	Brain MRI		Oligodontia	Dysmorphic thoracic T6-T10 vertebrae, thoracic scoliosis, kyphosis, tall lumbar vertebral bodies	Left cervical rib						Ht: -2.65 Wt: -2.16 OFC: ND
40	M	6-10		Head CT scan	Wide anterior fontanelb	Incisor macrodontia, tooth malposition (crowding)	(No visible abnormality of the curvature)a							Ht: -0.60 Wt: -5.96 OFC: ND
42	F	11-17	Head/teeth, spine, foot	Head CT scan	Impressiones digitataeb	Incisor macrodontiac	–	–					Cone-shaped epiphyses of toes and first metatarsals	Ht: +1.10 Wt: +0.70 OFC: ND
43	F	6-10		Brain MRI		Incisor macrodontia								ND
44	M	6-10		Brain MRI	(Normal anterior fontanel)a	–	(No visible abnormality of the curvature)a							Ht: +0.37 Wt: +0.80 OFC: +2.04
45	M	11-17		Brain MRI	(Normal anterior fontanel)a	Incisor macrodontia	(No visible abnormality of the curvature)a							Ht: -0.19 Wt: -0.82 OFC: 1.67
46	F	11-17	Teeth, spine, hand	Brain/ spine MRI	(Microcephaly < -3 SD, normal anterior fontanel)a	Incisor macrodontia, tooth malposition (crowding)c	Partial C1/occiput fusion, retroflexed odontoid process, dorsal hydromyelia, conus medullaris located at L2b	–		Short middle phalanx of 5th finger, dysmorphic proximal carpal row	Delayed			Ht: -2.28 Wt: -3.38 OFC: -6.12
47	M	6-10	Hand	Brain MRI	Wide anterior fontanel, metopic suture synostosisb	Incisor macrodontia (deciduous)	(No visible abnormality of the curvature)a			Short middle phalanx of 5th finger, dysmorphic proximal carpal row	Delayed			Ht: -0.33 Wt: -0.08 OFC: -0.75
48	F	6-10	Hand	Brain MRI	(Wide anterior fontanel)a	Incisor macrodontia (deciduous)	(No visible abnormality of the curvature)a			Short middle phalanx of 2nd and 5th left fingers, cone-shaped epiphyses of the phalanges	Normal			Ht: +0.06 Wt: -0.54 OFC: -0.24
49	M	6-10		Brain MRI	(Normal anterior fontanel)a	Incisor macrodontia, tooth malposition (deciduous)	(No visible abnormality of the curvature)a							Ht: -0.07 Wt: -0.87 OFC: -0.75
50	M	3-5		Brain MRI		Oligodontia (deciduous dentition)	(No visible abnormality of the curvature)a							Ht: -1.72 Wt: -0.77 OFC: -1.94
51	F	11-17	Spine/pelvis	Brain/ spine MRI	(Normal anterior fontanel)a	Incisor macrodontia, tooth malposition (crowding)	Thoracic hyperkyphosis; hydromyelia, conus medullaris located at L3b	C7 hypertrophic transverse process				Femoral heads asymmetry (left 4.5 mm higher)		Ht: +0.28 Wt: -0.25 OFC: -0.49
52	F	3-5	Hand	Spine MRI	(Normal anterior fontanel)a	Normal (deciduous dentition)	Scoliosis, thoracic T6-T7 butterfly vertebraeb	–		Short middle phalanx of 5th finger, pseudoepiphyses of 2nd metacarpal	Delayed			Ht: -0.77 Wt: -1.71 OFC: -2.01
53	F	0-2	Spine, hand		(Normal anterior fontanel)a	Normal (deciduous dentition)	–	Bilateral cervical ribs		–	Normal			Ht: +0.64 Wt: +0.29 OFC: +1.48
54	F	3-5		Brain MRI	(Normal anterior fontanel)a	Incisor macrodontia (deciduous), oligodontia, tooth malposition (crowding)	(No visible abnormality of the curvature)a							Ht: -0.58 Wt: -0.63 OFC: ND
Legend: Pt.#, participant; ND, not determined; –, normal; F, female; M, male; m, months; y, years; SD, standard deviations; Ht, height; Wt, weight; OFC, head circumference; MRI, magnetic resonance imaging; CT, computed tomography. Cells with unavailable data were left empty. a assessed through physical examination; b assessed through MRI or CT scan; c also assessed through orthopantomography or x…

## Sheet: ST3
Supplementary Table S3. Skeletal maturation of the hand assessed through 36 radiographs from 27 participants.
						Skeletal maturation
Case	Sex	Age	Bone age		Z-score	Per evaluation	Per patient	Differential ossification
a	M	(11-17y)	same age	phalanges	2.09524	Advanced	Advanced	Yes (carpal lags behind)
			+2y	carpal	-0.190476	Normal
b	M	1y 8m	6m		-5.18519	Delayed	Delayed	No
c	F	14m	3m		-4.07407	Delayed	Delayed	No
		6y 8m	3y		-5.3012	Delayed
d	F	7y 7m	4y 2m		-4.65909	Delayed	Delayed	No
e	M	11y	7y	phalanges	-4.57143	Delayed	Delayed	Not significant
			5y 6m	carpal	-6.28571	Delayed
		14y 6m	11y 6m	phalanges	-3	Delayed
			11y	carpal	-3.5	Delayed
f	F	7y	4y 6m		-3.61446	Delayed	Delayed	No
g	M	6y 8m	5y		-3.16832	Delayed	Delayed	No
h	M	7y 8m	5y		-2.96296	Delayed	Delayed	No
i	M	5y 2m	3y 4m		-2.61905	Delayed	Delayed	No
j	F	3y 5m	2y 6m	phalanges	-2	Delayed	Delayed	Yes (carpal lags behind)
			1y 3m	carpal	-4.72727	Delayed
		6y 2m	5y	phalanges	-1.55556	Normal
			2y 6m	carpal	-5.77778	Delayed
		9y 3m	8y 10m	phalanges	-0.537634	Normal
			6y 10m	carpal	-3.11828	Delayed
		10y 2m	10y	phalanges	-0.185185	Normal
			7y 10m	carpal	-2.59259	Delayed
k	F	4y 10m	4y	phalanges	-1.16279	Normal	Delayed	Yes (carpal lags behind)
			2y	carpal	-3.95349	Delayed
l	F	2y	1y 6m	phalanges	-1	Normal	Delayed	Yes (carpal lags slightly behind)
			3m	carpal	-5.25	Delayed
		6y	5y	phalanges	-1.33333	Normal
			4y 2m	carpal	-2.22222	Delayed
m	M	13y 1m	10y 10m		-2.43243	Delayed	Delayed	No
n	M	4y	3y 6m	phalanges	-0.857143	Normal	Delayed	Yes (carpal lags behind)
			2y	carpal	-3.42857	Delayed
		5y 6m	5y	phalanges	-0.659341	Normal
			3y	carpal	-3.2967	Delayed
o	M	7y 1m	8y	phalanges	1.08911	Normal	Delayed	Yes (carpal lags behind)
			5y	carpal	-2.47525	Delayed
p	F	8y	7y		-1.36364	Normal	Normal	No
q	F	6y	5y		-1.33333	Normal	Normal	No
r	F	1y 1m	10m		-1.11111	Normal	Normal	No
s	M	11y 10m	11y		-0.961538	Normal	Normal	No
t	F	7y 1m	5y 9m		-1.92771	Normal	Normal	No
		12y 8m	13y 6m		0.684932	Normal
u	F	10m	9m		-0.37037	Normal	Normal	No
		16y 2m	16y		-0.133333	Normal
v	M	14y 8m	15y	phalanges	0.333333	Normal	Normal	Not significant
			14y	carpal	-0.666667	Normal
w	F	13y	12y 11m		-0.0684932	Normal	Normal	No
x	M	14y 8m	15y 1m		0.357143	Normal	Normal	No
y	F	13y 6m	15y	phalanges	1.23288	Normal	Normal	Not significant
			13y	carpal	-0.410959	Normal
z	F	2y 9m	3y		0.625	Normal	Normal	No
aa	M	17y	19y		1.55844	Normal	Normal	No
Legend: F, female; M, male; y, years; m, months.

## Sheet: ST4
Supplementary Table S4. Clinical data from our cohort.
Clinical features	n/n evaluated	%
Craniofacial features
Bulbous nose	39/49	79.5918
Cupid bow upper lip	35/47	74.4681
Broad eyebrows	33/46	71.7391
Anteverted nares	30/48	62.5
Long philtrum	29/47	61.7021
Hypertelorism/telecanthus	26/45	57.7778
Synophrys	28/48	58.3333
Large protruding ears	25/47	53.1915
Prominent nasal bridge	23/43	53.4884
Triangular face	24/46	52.1739
Low hairline	21/43	48.8372
Broad forehead	18/44	40.9091
Thin lips	18/46	39.1304
Brachycephaly	15/43	34.8837
Thick lips	14/44	31.8182
Coarse face	10/44	22.7273
Microcephaly 1	5/36	13.8889
Macrocephaly 1	3/36	8.33333
Ptosis	7/44	15.9091
Hands
Brachydactyly	30/45	66.6667
Small hands	24/43	55.814
Syndactyly	5/41	12.1951
Fifth finger distal phalanx clinodactyly	21/42	50
Skeletal
Short stature, total 1	13/47	27.6596
Short stature, males 1	3/20	15
Short stature, females	10/27	37
Scoliosis / kyphosis / lordosis	14/52	26.9231
Pectus excavatum	3/45	6.66667
Hematology
Leukopenia	4/45	8.88889
Thrombocytopenia	3/44	6.81818
Cardiovascular system
Cardiac anomalies	13/38	34.2105
Ventricular septal defect	7/38	18.4211
Atrial septal defect	4/38	10.5263
Patent foramen ovale	3/38	7.89474
Patent ductus arteriosus	2/38	5.26316
Atrioventricular canal defect	1/38	2.63158
Wolff-Parkinson-White syndrome	1/38	2.63158
Dysplastic pulmonary valve	1/38	2.63158
Tricuspid regurgitation	1/38	2.63158
Aortic regurgitation	1/38	2.63158
Scimitar syndrome	1/38	2.63158
Urogenital
Cryptorchidism	9/29	31.0345
Renal anomalies	2/41	4.87805
Endocrine
Hypothyroidism	2/46	4.34783
Growth hormone deficiency	2/47	4.25532
Eyes
Strabismus	13/44	29.5455
Hyperopia	7/38	18.4211
Myopia	3/38	7.89474
Nystagmus	1/44	2.27273
Hearing
Hearing impairment (total)	21/51	41.1765
Conductive hearing impairment	10/51	19.6078
Sensorineural hearing impairment	3/51	5.88235
Mixed hearing impairment	2/51	3.92157
Skin
Deep plantar creases	2/43	4.65116
Hyperpigmentation of the skin	2/44	4.54545
Hair
Hypertrichosis	11/44	25
High, thin anterior hairline	5/44	11.3636
Gastrointestinal
Feeding difficulties	22/48	45.8333
Gastroesophageal reflux	13/44	29.5455
Chronic constipation	9/48	18.75
Development
Mild/moderate intellectual disability	39/53	73.5849
Attention deficit hyperactivity disorder	19/47	40.4255
Autism spectrum disorders	14/46	30.4348
Sleep disturbance	12/49	24.4898
Aggressive behavior	10/46	21.7391
Anxiety	10/47	21.2766
Normal intellectual ability	10/49	20.4082
Oppositional defiant disorder	5/47	10.6383
Intense headache	4/44	9.09091
Impaired social interactions	4/47	8.51064
Obsessive-compulsive behavior	3/47	6.38298
Stereotypies	3/47	6.38298
Severe intellectual disability	2/53	3.8
Seizures
History of epilepsy	15/53	28.3019
Drug-responsive epilepsy	9/15	60
Status epilepticus	5/15	33.3333
Febrile seizures	3/15	20
Age of onset, median / mean	2 years / 4.2 years
Age of onset, range	8 weeks - 15 years
Developmental milestones
Median age of sitting	10 months
Median age of walking	19 months
Median age of first words	20 months
1 Excluding 2 boys treated with growth hormone

## Sheet: ST5
Supplementary Table S5. Genetic variants in the ANKRD11 locus in our cohort. Novel variants include ACMG/AMP classification20,21 using gnomAD v2.1.150 and DGV51 (accession: August 2022) as reference population databases, and pathogenicity scoring according to in silico prediction tools CADD,52 Splice AI,53 MutationTaster,54 SIFT55 and PolyPhen2.56 Structural variants were visualized with UCSC Gen…
Pt.	ANKRD11 locus Structure (hg38) or Sequence (NM_013275.5) variant	Aminoacid change (NP_037407.4)	Variant ype	Exons	Inheritance	ACMG/AMP classification [criteria] (SV score)	Mutation Taster	CADD	Other predictions	Detection method	Novelty
1	c.4528_4529del	p.(Pro1510Alafs*43)	Frameshift	9	de novo					NGS panel	De Bernardi et al., 2018 [19]
2	c.1460_1463del	p.(Glu487Valfs*22)	Frameshift	9	de novo					WES	Ockeloen et al., 2015 [8]
3	16q24.3(89343221_89520017)x1	na	177kb deletion, whole CDS	1-2	de novo	Likely Pathogenic (0.9)				CMA	this report
4	16q24.2q24.3(88621654_89376245)x1	na	755kb deletion, 5'UTR	3-13	de novo	Pathogenic (1)				CMA	this report
5	c.3779C>A	p.(Ser1260*)	Nonsense	9	de novo	5 [PVS1,PS2,PM2]	D	35		WES	this report
6	c.7189C>T	p.(Gln2397*)	Nonsense	9	de novo					WES	Sirmaci et al., 2011 [1]
7	c.7806+2T>C	p.(?)	Splicing	intron 12	de novo	5 [PVS1,PS2,PM2,PP5]	D	32	Splice AI: D	Single gene sequence	LOVD (#0000338853)
8	c.1903_1907del	p.(Lys635Glnfs*26)	Frameshift	9	de novo					WES	Goldenberg et al., 2016 [58]
9	c.1903_1907del	p.(Lys635Glnfs*26)	Frameshift	9	Not tested					WES	Goldenberg et al., 2016 [58]
10	c.4964_4965del	p.(Lys1655Argfs*12)	Frameshift	9	Maternal	5 [PVS1,PM2,PP4]	D			WES	this report
11	16q24.3(89350375_89510638)x1	na	158kb deletion, 5'UTR	1-2	de novo	Likely Pathogenic (0.9)				SNP array	this report
12	c.1903_1907del	p.(Lys635Glnfs*26)	Frameshift	9	Maternal					Single gene sequence	Goldenberg et al., 2016 [58]
13	c.505G>T	p.(Glu169*)	Frameshift	6	de novo	5 [PVS1,PS2,PM2]	D	39		Single gene sequence	this report
14	c.3509_3512del	p.(Lys1170Serfs*147)	Frameshift	9	de novo	5 [PVS1,PS2,PM2]	D			N/A	this report
15	c.1977C>G	p.(Tyr659*)	Nonsense	9	de novo					NGS panel	Gnazzo et al., 2020 [3]
16	c.2412del	p.(Glu805Lysfs*58)	Frameshift	9	Maternal					NGS panel	Gnazzo et al., 2020 [3]
17	c.7192C>T	p.(Gln2398*)	Nonsense	9	de novo					NGS panel	Gnazzo et al., 2020 [3]
18	c.1977C>G	p.(Tyr659*)	Nonsense	9	de novo					NGS panel	Gnazzo et al., 2020 [3]
19	c.1457C>G	p.(Ser486*)	Nonsense	9	de novo					NGS panel	Gnazzo et al., 2020 [3]
20	c.1285_1286del	p.(Ser429Glyfs*8)	Frameshift	9	de novo					NGS panel	Gnazzo et al., 2020 [3]
21	c.7216C>T	p.(Gln2406*)	Nonsense	9	Parents not tested					NGS panel	Murray et al., 2017 [9]
22	c.3309dup	p.(Asp1104Argfs*2)	Frameshift	9	de novo					NGS panel	Gnazzo et al., 2020 [3]
23	c.4391_4392del	p.(Lys1464fs*89)	Frameshift	9	Parents not tested					N/A	Ockeloen et al., 2015 [8]
24	c.4964_4965del	p.(Lys1655Argfs*12)	Frameshift	9	de novo	5 [PVS1,PS2,PM2]	D			N/A	this report
25	c.7481dup	p.(Pro2495Serfs*37)	Frameshift	10	Maternal					N/A	Ockeloen et al., 2015 [8]
26	c.2092_2096del	p.(Glu698Thrfs*2)	Frameshift	9	de novo	5 [PVS1,PS2,PM2,PP5]	D			N/A	ClinVar (ID 976298, rs2034502951)
27	c.7048C>T	p.(Gln2350*)	Nonsense	9	de novo	5 [PVS1,PS2,PM2]	D	45		Targeted WES	this report
28	c.2408_2412del	p.(Lys803Argfs*5)	Frameshift	9	de novo					Single gene sequence	Low et al., 2016 [5]
29	c.3693_3697del	p.(Asp1231Glufs*3)	Frameshift	9	de novo	5 [PVS1,PS2,PM2]	D			WES	this report
30	c.7606C>T	p.(Arg2536Trp)	Missense	11	de novo					NGS panel	de Boer et al., 2022 [23]
31	16q24.2q24.3(87169884_89487487)x1	na	2.32Mb deletion, whole CDS	2-13	de novo	Pathogenic (1)				CMA	this report
32	c.7535G>A	p.(Arg2512Gln)	Missense	10	Maternala					NGS panel	Walz et al., 2015 [59]
33	c.7535G>A	p.(Arg2512Gln)	Missense	10	Parents not testeda					Segregation analysis	Walz et al., 2015 [59]
34	c.3024_3025dup	p.(Lys1009Argfs*310)	Frameshift	9	de novo	5 [PVS1,PS2,PM2]	D			Single gene sequence	this report
35	c.1381_1384del	p.(Glu461Glnfs*48)	Frameshift	9	de novo					NGS panel	Goldenberg et al., 2016 [58]
36	c.6836_6837del	p.(Val2279Glyfs*16)	Frameshift	9	de novo		D			NGS panel	Loberti et al., 2022 [48]
37	c.7470+1G>C	p.(?)	Splicing	intron 9	de novo	5 [PVS1,PS2,PM2]	D	33	Splice AI: D	N/A	this report
38	c.1903_1907del	p.(Lys635Glnfs*26)	Frameshift	9	de novo					N/A	Goldenberg et al., 2016 [58]
39	c.6982C>T	p.(Arg2328*)	Nonsense	9	Parents not tested	4 [PVS1,PM2]	D	35		NGS panel	this report
40	c.1903_1907del	p.(Lys635Glnfs*26)	Frameshift	9	de novo					N/A	Goldenberg et al., 2016 [58]
42	c.3787_3788del	p.(Glu1263Thrfs*19)	Frameshift	9	de novo	5 [PVS1,PS2,PM2]	D			N/A	this report
43	16q24.2q24.3(88197484_89331695)x1	na	1.13Mb deletion, whole CDS	3-13	Parents not testedb	Pathogenic (1)				CMA	this report
44	c.7945G>A	p.(Val2649Met)	Missense	13	de novo	5 [PS2,PM1,PM2,PP3,PP5]	D	22.8	SIFT, PP2: D	WES	ClinVar (ID 1301284)
45	c.3562C>T	p.(Arg1188*)	Nonsense	9	Father not tested	5 [PVS1,PM2,PP5]	D	33		WES	Gao et al., 2022 [30]
46	c.3055_3059del	p.(Arg1019Glyfs*14)	Frameshift	9	de novo		D			WES	Loberti et al., 2022 [48]
47	c.4205dup	p.(Tyr1402*)	Frameshift	9	de novo		D			WES	ClinVar (ID 426290, rs1085307544)
48	c.5813_5817del	p.(Pro1938Glnfs*10)	Frameshift	9	Maternalc	5 [PVS1,PM2,PP1]	D			Single gene sequence	this report
49	c.3835dup	p.(Ser1279Lysfs*4)	Frameshift	9	de novo	5 [PVS1,PS2,PM2]	D			Single gene sequence	this report
50	c.6792dup	p.(Ala2265Argfs*8)	Frameshift	9	de novo					NGS panel	Goldenberg et al., 2016 [58]
51	c.1583dup	p.(Ser528Argfs*51)	Frameshift	9	de novo	5 [PVS1,PS2,PM2]	D			Single gene sequence	this report
52	c.4117A>T	p.(Lys1373*)	Nonsense	9	de novo	5 [PVS1,PS2,PM2]	D	36		WES	this report
53	c.5813_5817del	p.(Pro1938Glnfs*10)	Frameshift	9	Maternalc	5 [PVS1,PM2,PP1]	D			Single gene sequence	this report
54	c.2366_2367del	p.(Lys789Argfs*7)	Frameshift	9	de novo	5 [PVS1,PS2,PM2,PP5]	D			WES trio	LOVD (#0000616278)
a Mother and daughter, both affected. b The child was born via IVF with donor sperm. Mother declined segregation testing. c Sisters, variant inherited from a mildly affected parent
SV, structural variant; N/A, not available; NGS, next generation sequencing; WES, whole exome sequencing; CMA, chromosomal microarray; SNP, single nucleotide polymorphism; LOVD, Leiden open variation database; ACMG, American College of Medical Genetics and Genomics; AMP, Association for Molecular Pathology
Additional References:
50.	Karczewski, K.J.; Francioli, L.C.; Tiao, G.; Cummings, B.B.; Alföldi, J.; Wang, Q.; Collins, R.L.; Laricchia, K.M.; Ganna, A.; Birnbaum, D.P.; et al. The Mutational Constraint Spectrum Quantified from Variation in 141,456 Humans. Nature 2020, 581, 434–443, doi:10.1038/s41586-020-2308-7.
51.	MacDonald, J.R.; Ziman, R.; Yuen, R.K.C.; Feuk, L.; Scherer, S.W. The Database of Genomic Variants: A Curated Collection of Structural Variation in the Human Genome. Nucleic Acids Res 2014, 42, D986-992, doi:10.1093/nar/gkt958.
52.	Rentzsch, P.; Schubach, M.; Shendure, J.; Kircher, M. CADD-Splice-Improving Genome-Wide Variant Effect Prediction Using Deep Learning-Derived Splice Scores. Genome Med 2021, 13, 31, doi:10.1186/s13073-021-00835-9.
53.	Jaganathan, K.; Kyriazopoulou Panagiotopoulou, S.; McRae, J.F.; Darbandi, S.F.; Knowles, D.; Li, Y.I.; Kosmicki, J.A.; Arbelaez, J.; Cui, W.; Schwartz, G.B.; et al. Predicting Splicing from Primary Sequence with Deep Learning. Cell 2019, 176, 535-548.e24, doi:10.1016/j.cell.2018.12.015.
54.	Schwarz, J.M.; Cooper, D.N.; Schuelke, M.; Seelow, D. MutationTaster2: Mutation Prediction for the Deep-Sequencing Age. Nat Methods 2014, 11, 361–362, doi:10.1038/nmeth.2890.
55.	Vaser, R.; Adusumalli, S.; Leng, S.N.; Sikic, M.; Ng, P.C. SIFT Missense Predictions for Genomes. Nat Protoc 2016, 11, 1–9, doi:10.1038/nprot.2015.123.
56.	Adzhubei, I.A.; Schmidt, S.; Peshkin, L.; Ramensky, V.E.; Gerasimova, A.; Bork, P.; Kondrashov, A.S.; Sunyaev, S.R. A Method and Server for Predicting Damaging Missense Mutations. Nat Methods 2010, 7, 248–249, doi:10.1038/nmeth0410-248.
57.	Kent, W.J.; Sugnet, C.W.; Furey, T.S.; Roskin, K.M.; Pringle, T.H.; Zahler, A.M.; Haussler, D. The Human Genome Browser at UCSC. Genome Res 2002, 12, 996–1006, doi:10.1101/gr.229102.
58.	Goldenberg, A.; Riccardi, F.; Tessier, A.; Pfundt, R.; Busa, T.; Cacciagli, P.; Capri, Y.; Coutton, C.; Delahaye-Duriez, A.; Frebourg, T.; et al. Clinical and Molecular Findings in 39 Patients with KBG Syndrome Caused by Deletion or Mutation of ANKRD11. Am J Med Genet A 2016, 170, 2847–2859, doi:10.1002/ajmg.a.37878.
59.	Walz, K.; Cohen, D.; Neilsen, P.M.; Foster, J.; Brancati, F.; Demir, K.; Fisher, R.; Moffat, M.; Verbeek, N.E.; Bjørgo, K.; et al. Characterization of ANKRD11 Mutations in Humans and Mice Related to KBG Syndrome. Hum Genet 2015, 134, 181–190, doi:10.1007/s00439-014-1509-2.

## Sheet: ST6
Supplementary Table S6. Correlation analysis of recurring neuroradiological and skeletal phenotypes (frequency ≥ 20%) with variant type, classified according to three categories: Large deletion (16q24 locus deletion including all or part of ANKRD11), Protein absence (nonsense, frameshift and splice site intragenic variants impairing allele expression), Defective protein (missense variants leading…
Phenotype			Genotype			P value (95% CI)
Characteristic	Total/n evaluated (n = 53)		Large deletion (n = 5)	Protein absence (n = 44)	Defective protein (n = 4)
Large cisterna magna	28/44		4	23	2	0.3731
Incomplete hippocampal inversion	26/41		4	21	1	0.1884
Abnormal lateral ventricle morphology	15/41		3	12	0	0.1445
White matter abnormalities	8/41		1	7	0	1
Wide anterior fontanela	13/43		2	10	1	0.666
Macrodontia of upper incisors (all ages)a	39/51		3	34	2	0.4082
Macrodontia of permanent upper incisorsa	30/35		3	25	2	0.2558
Scoliosis/Kyphosisa	14/52		1	12	1	1
Scoliosis/Kyphosis (imaging only)	11/32		1	9	1	1
Abnormal vertebral morphology	7/32		0	5	2	0.1525
C7 rib/hypertrophic transverse process	18/29		1	15	2	1
Short phalanx of the hand	12/27		0	12	0	1
Abnormal carpal morphology	7/27		0	7	0	1
Delayed skeletal maturation	14/27		0	14	0	1
Hip asymmetry	3/14		1	2	0	0.2143
Short stature (all)a	13/49		0	11	2	0.4518
Short stature (females only)a	10/27		0	8	2	0.1282
Short stature (males only)a	3/22		0	3	0	1
a also assessed through physical examination

## Sheet: ST7
Supplementary Table S7. Correlation analysis of type and number of brain MRI anomalies with the presence of epilepsy and with the presence and severity of intellectual disability (ID). p, p value; CI, confidence interval; ND, not determined
Brain MRI findings			Epilepsy		Correlation with presence (p, 95% CI)		Intellectual Disability					Correlation with severity (p, 95% CI)	Presence vs absence (p, 95% CI)
	Total (n = 41)		Yes (n = 14)	No (n = 27)			Present (n = 37)	Severe (n = 3)	Moderate (n = 7)	Mild (n = 27)	Absent (n = 4)
Type of finding:
Large cisterna magna	26		8	18	0.7337		23	2	5	16	3	0.9441	1
Incomplete hippocampal inversion	26		10	16	0.5119		24	2	4	18	2	0.8421	0.6149
Abnormal ventricle morphology	15		5	10	1		14	1	2	11	1	0.9441	1
Intracranial cysts	5		3	2	0.317		5	0	0	5	0	0.7268	1
White matter abnormalities	8		3	5	1		8	0	2	6	0	0.7713	0.569
Number of findings:
Three or more of the above features	14		5	10	1		14	1	3	10	0	0.5235	0.2802
Two of the above features	13		5	7	0.7186		11	1	1	9	2	0.7147	0.5795
Only a single feature	7		2	5	1		5	0	1	4	2	0.3014	0.1284
Normal MRI	7		2	5	ND		7	1	2	4	0	ND	ND
